# Supplementary material
Source: PubMed Central journal article supplement (PMC5800836)
Supplement: jc.2017-02120.st1.pdf [file jc.2017-02120.st1.pdf]

**Supplemental Table 1:** Percentage of individuals in the unexplained infertility group and severe male factor group who had their prolactin measured using a given assay within a specific laboratory (“Laboratory/Assay for prolactin measurement” takes into account both the assay and the specific laboratory in which prolactin was measured). Prolactin was measured in four separate hospital laboratories and an additional outside laboratory; two of these laboratories changed their prolactin assay once during the 13-year period. There was not a significant difference in where and how prolactin was measured between the two groups (overall chi-squared p-value=0.82).

| Laboratory/Assay for prolactin measurement | Reference range (ng/ml) | Unexplained infertility (%) | Severe male factor (%) | p-value |
|--------------------------------------------|-------------------------|-----------------------------|------------------------|---------|
| 1                                          | 0-20                    | 29.1%                       | 26.7%                  | 0.85    |
| 2                                          | 4.79-23.3               | 5.8%                        | 6.7%                   | 0.74    |
| 3                                          | 2.7-26.7                | 24.4%                       | 28.9%                  | 0.57    |
| 4                                          | 3-27                    | 11.1%                       | 13.3%                  | 0.61    |
| 5                                          | 2.8-29.2                | 10.5%                       | 4.4%                   | 0.26    |
| 6                                          | 2.8-26.7                | 2.3%                        | 0                      | 0.58    |
| 7                                          | 3-30                    | 2.3%                        | 4.4%                   | 0.61    |
| Unknown                                    |                         | 14.5%                       | 15.6%                  | 0.82    |
